# Supplementary material for: Gene–Environment Interactions in Irrational Beliefs: The Roles of Childhood Adversity and Multiple Candidate Genes
Source: MDPI journal article supplement (doi:10.3390/ijms25084206), 2024-04-10

# SERT\_rs\_25531

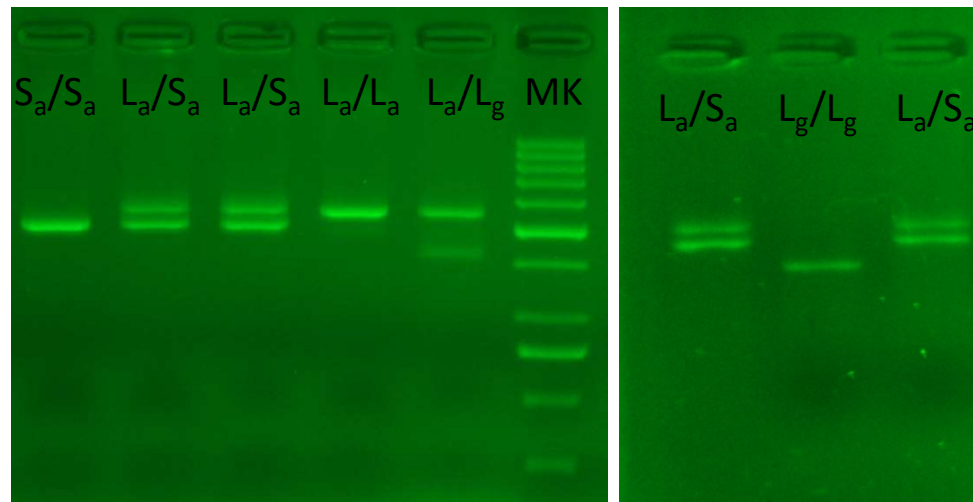

# COMT\_rs\_6269

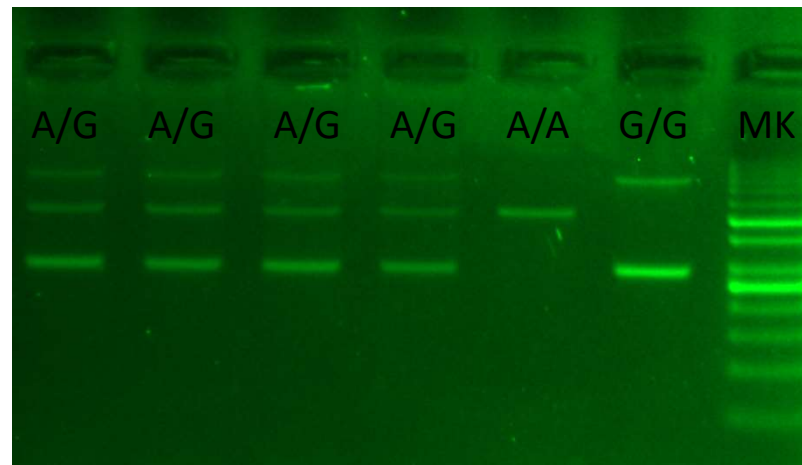

# COMT\_rs\_737865

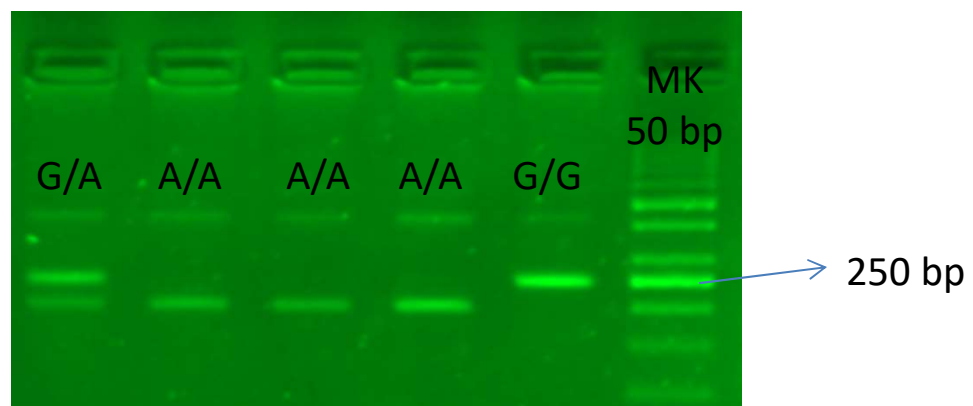

# COMT\_rs\_165774

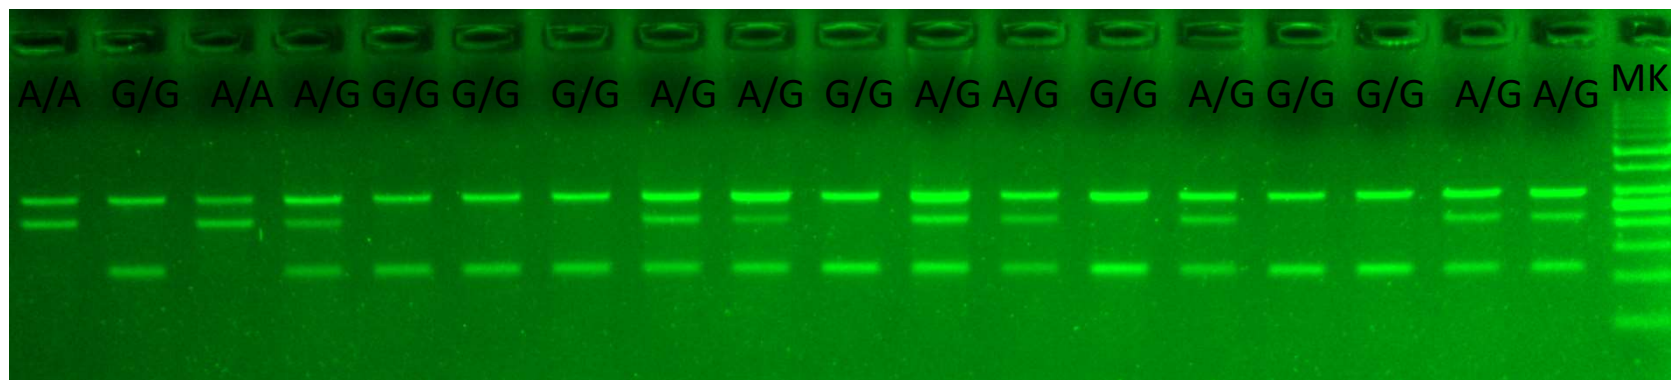

COMT\_rs\_2075507

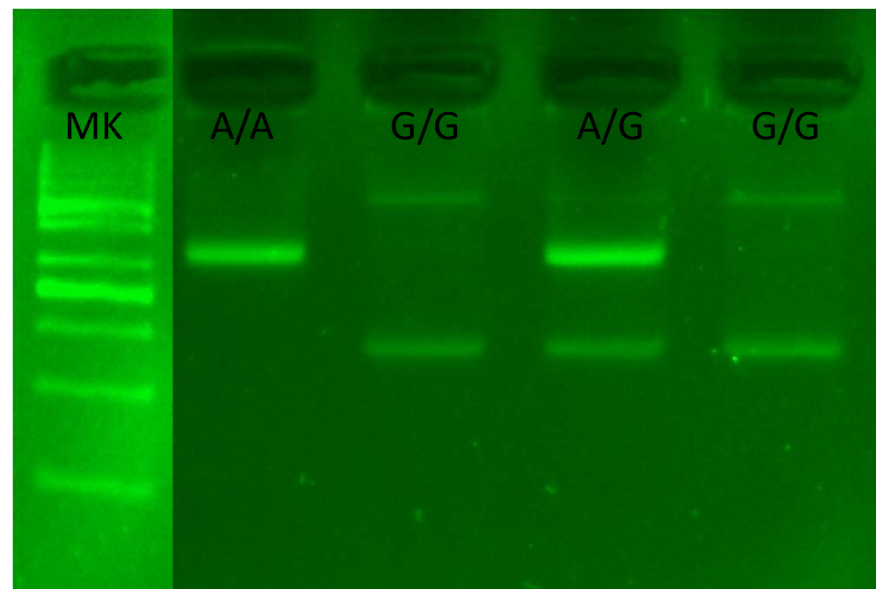

# COMT\_rs\_4818

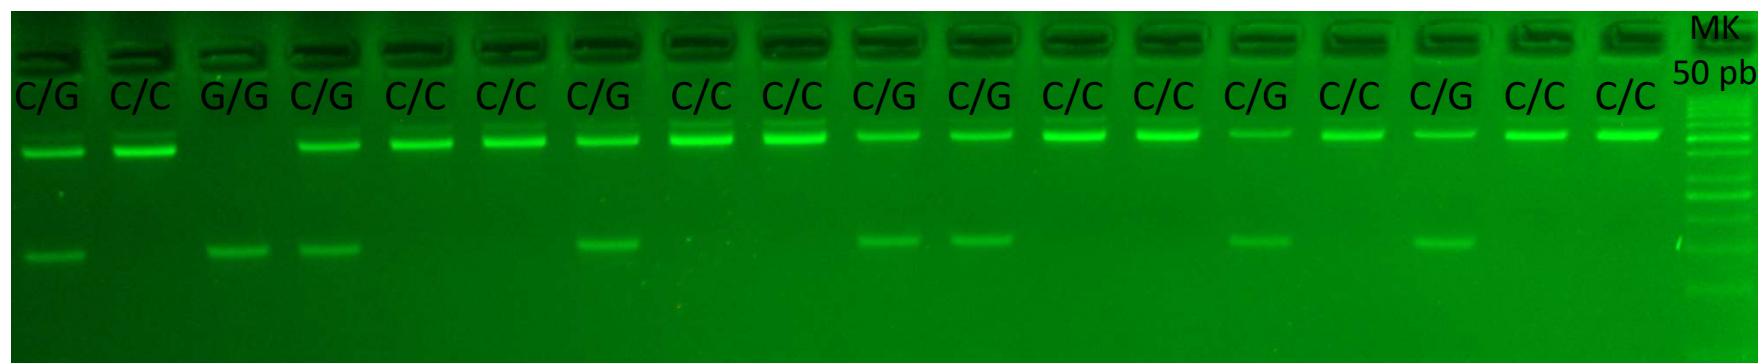

# BDNF\_rs\_6265

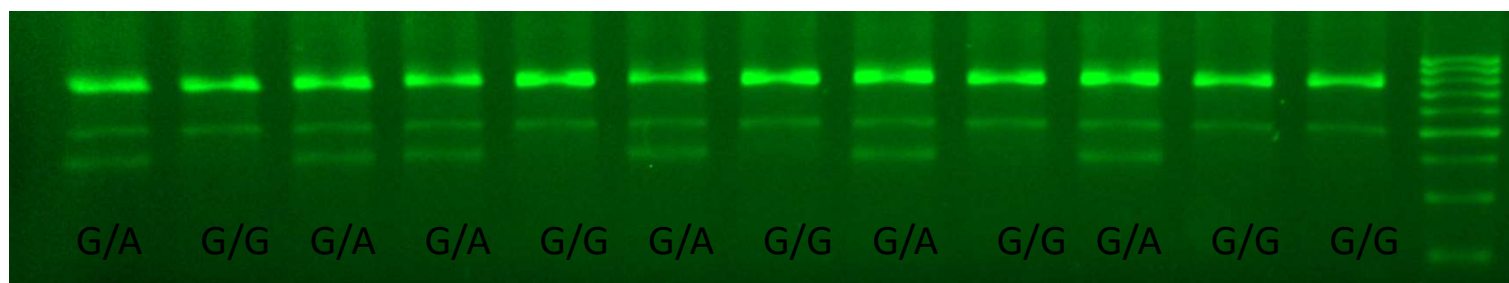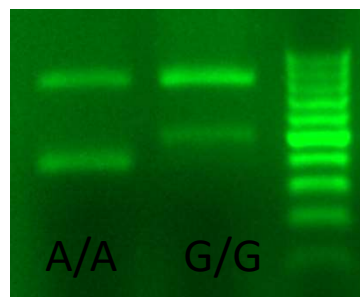

**BDNF\_rs\_988748**

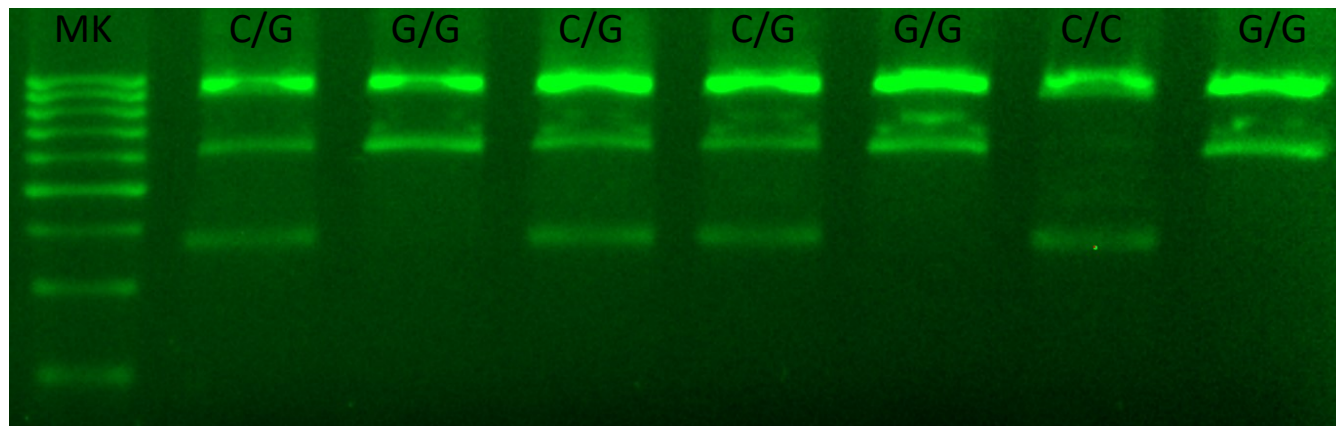



**BDNF\_rs\_7103411**

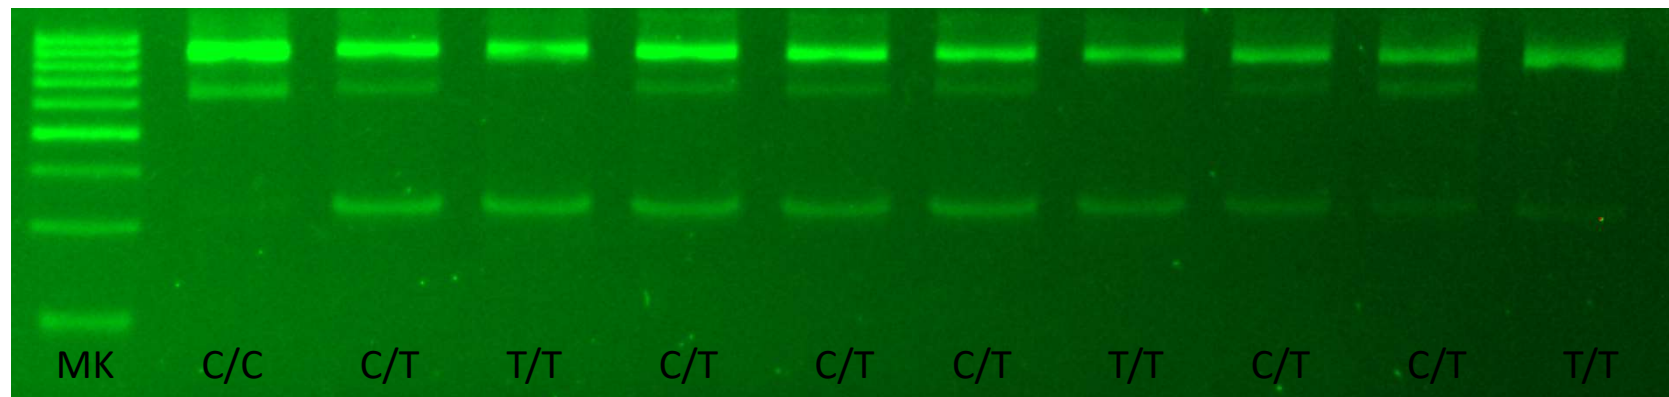

# BDNF\_rs\_11030104

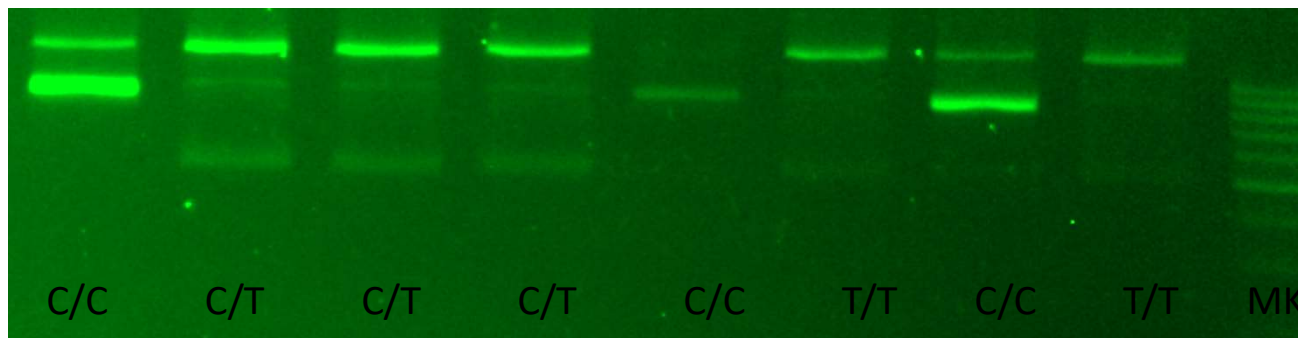

# BDNF\_rs\_11757

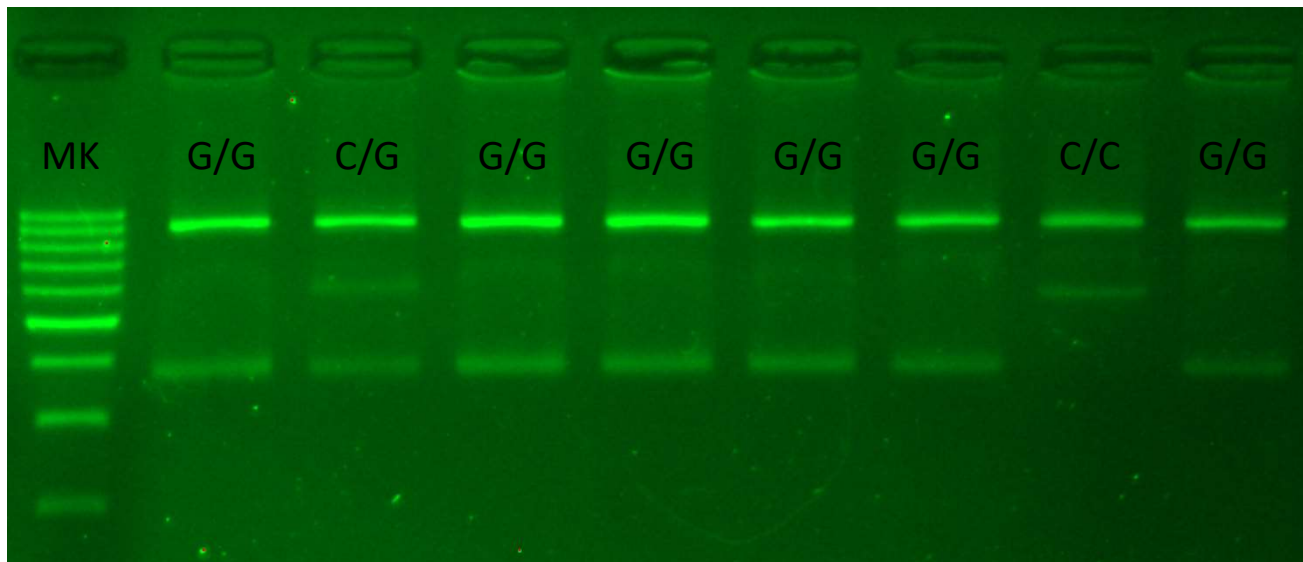

**CRHR1\_rs\_242938**

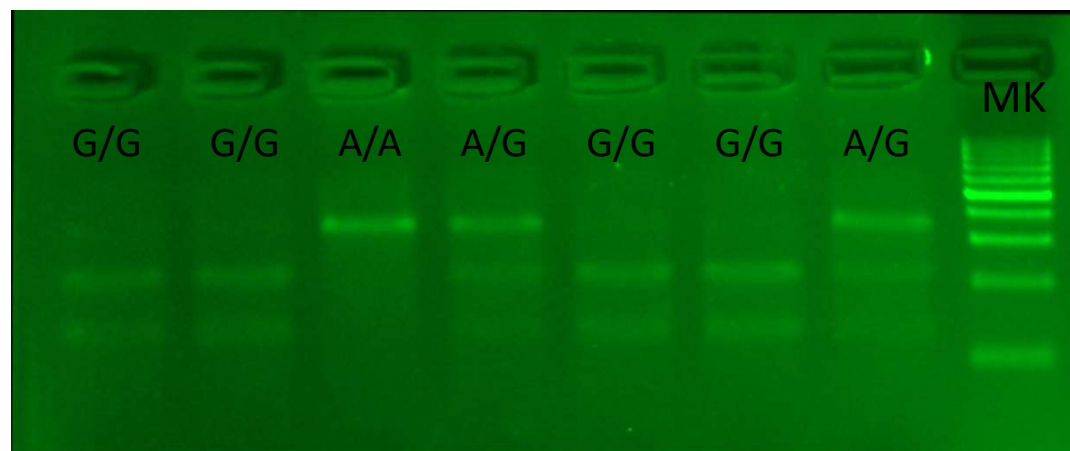

NR3C1\_Bcll\_rs\_41423247

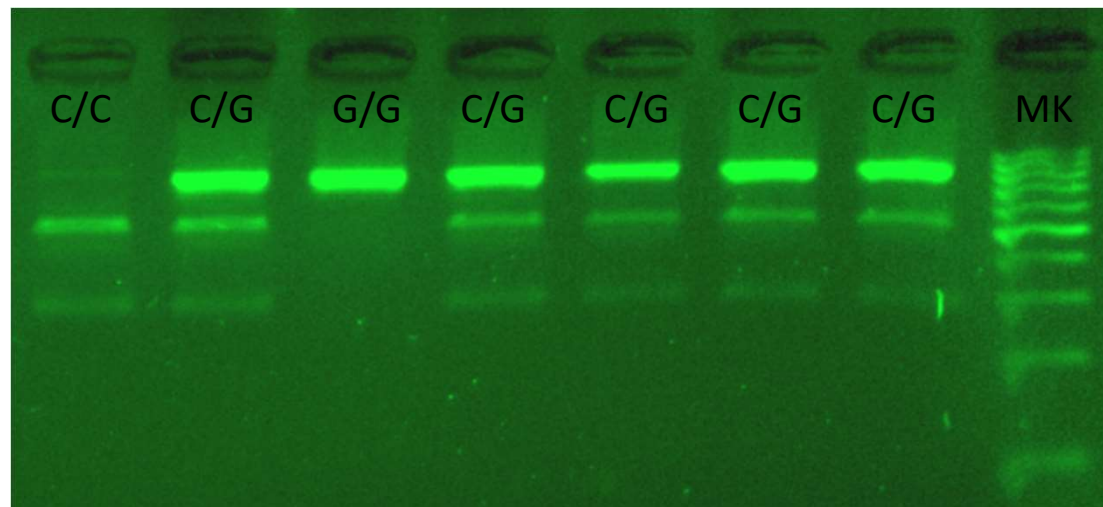

# NR3C1\_rs\_6189\_rs\_6190

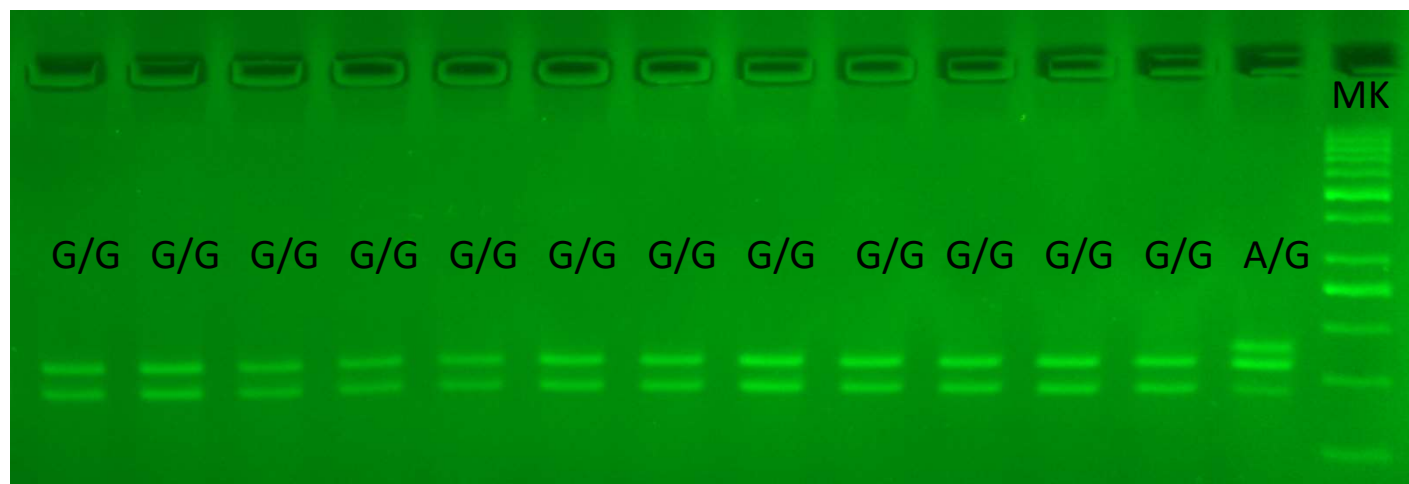

NR3C1\_N363S\_rs\_56149945

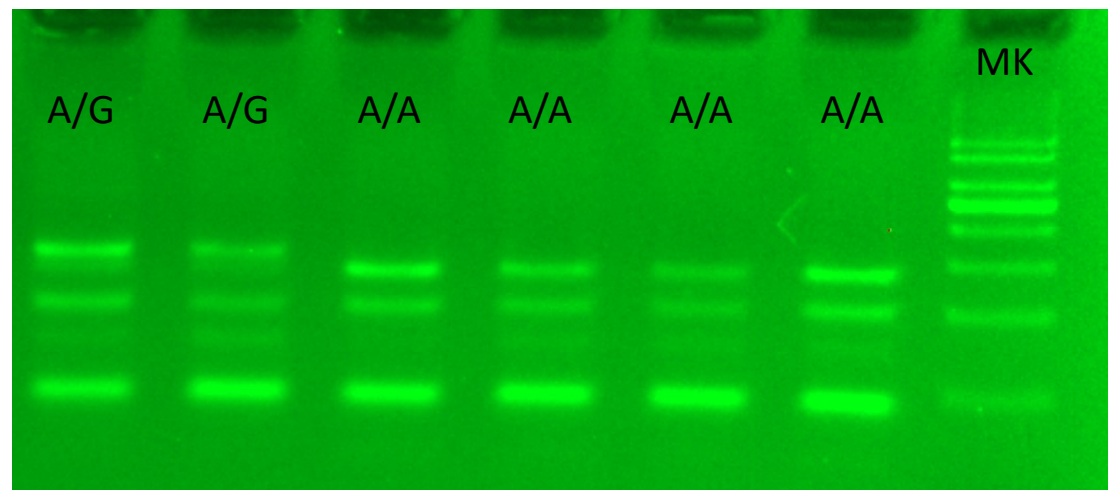

**OXTR\_rs\_53576**

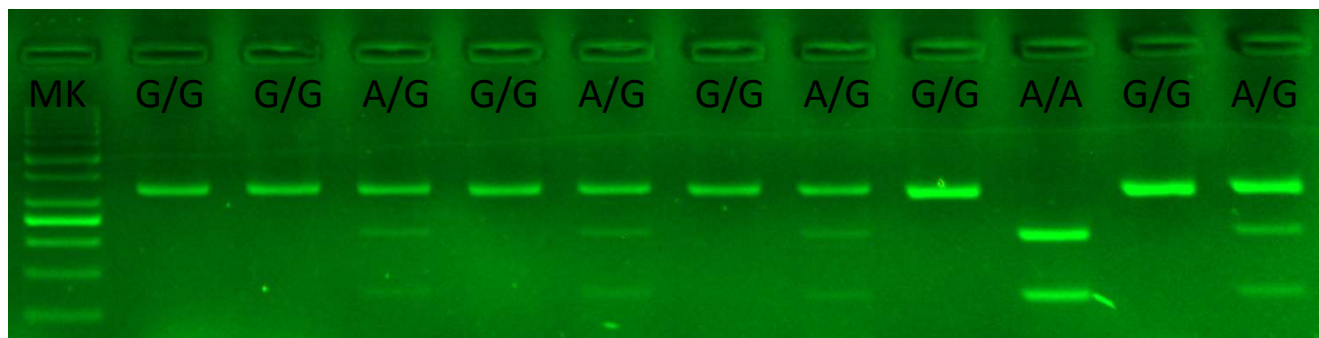



OXTR\_rs\_2254298

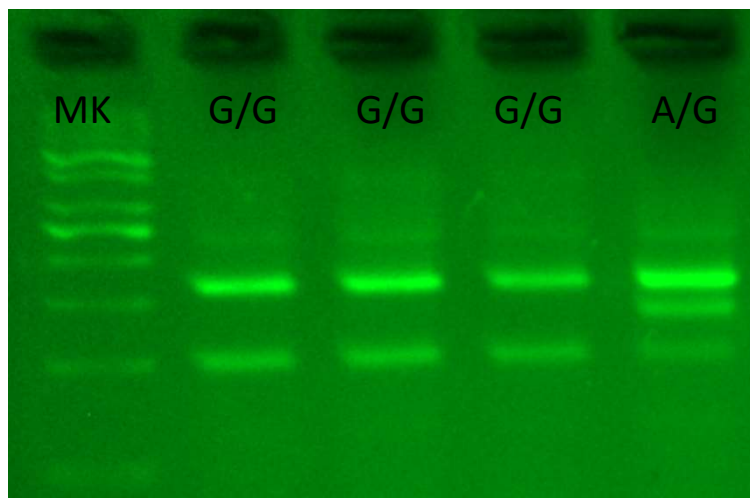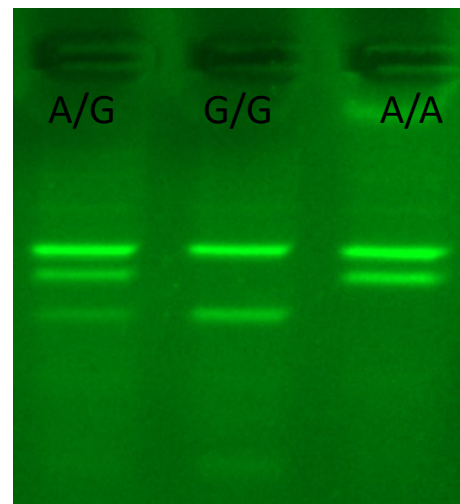

Supplement: s1 [file s1]
