# Supplementary material for: Gene–Environment Interactions in Irrational Beliefs: The Roles of Childhood Adversity and Multiple Candidate Genes
Source: MDPI journal article supplement (doi:10.3390/ijms25084206), 2024-04-10
Supplement: s1 [file s1]

### Supplementary Table 1

#### Characteristics of the sample

| Variable                   |               |
|----------------------------|---------------|
| Sex distribution (% women) | 84.73         |
| Age                        | 19.58 ± 3.53  |
| CTQ-SF                     | 38.82 ± 13.22 |
| RFQ                        | 1.82 ± 0.71   |
| ABS-2 total irrationality  | 59.02 ± 25.71 |
| GABS total irrationality   | 54.83 ± 15.78 |
| PHQ-9                      | 10.43 ± 5.84  |
| GAD-7                      | 8.65 ± 5.48   |

*Note:* Unless otherwise specified, all values indicate mean ± standard deviation.

## Supplementary Table 2

The relations between childhood maltreatment and specific irrational beliefs

| Childhood<br>maltreatment | ABS-2         |                    |                           |                 |                    |                      |                    | GABS               |                      |                    |                    |                      |                    |
|---------------------------|---------------|--------------------|---------------------------|-----------------|--------------------|----------------------|--------------------|--------------------|----------------------|--------------------|--------------------|----------------------|--------------------|
|                           | Demandingness | Self-downing       | Low frustration tolerance | Awfulizing      | Need for comfort   | Need for achievement | Need for approval  | Self-downing       | Need for achievement | Need for approval  | Need for comfort   | Demands for fairness | Other-downing      |
| CTQ-SF                    | .08 (N = 444) | .24**<br>(N = 444) | .10* (N = 444)            | .18** (N = 444) | .16**<br>(N = 444) | .11* (N = 444)       | .20**<br>(N = 444) | .21**<br>(N = 444) | .08 (N = 444)        | .16**<br>(N = 444) | .12**<br>(N = 444) | .05 (N = 444)        | .10**<br>(N = 444) |
| RFQ                       | .04 (N = 450) | .18**<br>(N = 450) | .09* (N = 452)            | .13** (N = 450) | .15**<br>(N = 452) | .08 (N = 450)        | .12* (N = 450)     | .18**<br>(N = 445) | .08 (N = 447)        | .12**<br>(N = 445) | .09*<br>(N = 445)  | .04 (N = 445)        | .09 (N = 445)      |

*Note:* CTQ-SF, Childhood Trauma Questionnaire – Short Form; ABS-2, Attitude and Belief Scale-2; GABS, General Attitudes and Belief Scale; RFQ, Risky Families Questionnaire. \*,  $p < 0.05$ ; \*\*  $p < 0.01$ .

### Supplementary Table 3

Coefficients from models in which ABS-2 irrational beliefs was regressed on CTQ childhood maltreatment, genotypes, and their interactions

| Model |                            |                          | B      | SE (B) | P     | 95% CI         |
|-------|----------------------------|--------------------------|--------|--------|-------|----------------|
| COMT  | rs6269 ( <i>N</i> = 304)   | CTQ (centered)           | 0.346  | 0.163  | 0.035 | 0.025; 0.666   |
|       |                            | Dummy 1 (AG vs. AA & GG) | 3.347  | 3.101  | 0.281 | -2.755; 9.449  |
|       |                            | Dummy 2 (GG vs. AA & AG) | 2.168  | 4.107  | 0.598 | -5.914; 10.250 |
|       |                            | CTQ × Dummy 1            | 0.016  | 0.218  | 0.942 | -0.412; 0.444  |
|       |                            | CTQ × Dummy 2            | -0.042 | 0.407  | 0.918 | -0.844; 0.760  |
|       | rs737865 ( <i>N</i> = 430) | CTQ (centered)           | 0.251  | 0.128  | 0.050 | 0.000; 0.502   |
|       |                            | Dummy 1 (AG vs. AA & GG) | 2.554  | 2.565  | 0.320 | -2.488; 7.596  |
|       |                            | Dummy 2 (GG vs. AA & AG) | 1.350  | 4.213  | 0.749 | -6.931; 9.632  |
|       |                            | CTQ × Dummy 1            | 0.157  | 0.195  | 0.421 | -0.226; 0.540  |
|       |                            | CTQ × Dummy 2            | 0.106  | 0.322  | 0.742 | -0.526; 0.738  |
|       | rs165774 ( <i>N</i> = 430) | CTQ (centered)           | 0.814  | 0.352  | 0.021 | 0.123; 1.506   |
|       |                            | Dummy 1 (AG vs. AA & GG) | 5.447  | 4.277  | 0.204 | -2.961; 13.854 |
|       |                            | Dummy 2 (GG vs. AA & AG) | 0.095  | 4.268  | 0.982 | -8.294; 8.484  |

|       |                         |                          |         |       |       |                 |
|-------|-------------------------|--------------------------|---------|-------|-------|-----------------|
|       |                         | CTQ $\times$ Dummy 1     | -0.342  | 0.371 | 0.358 | -1.072; 0.388   |
|       |                         | CTQ $\times$ Dummy 2     | -0.861  | 0.383 | 0.025 | -1.614; -0.108  |
|       | rs2075507 ( $N = 304$ ) | CTQ (centered)           | 0.487   | 0.275 | 0.077 | -0.054; 1.027   |
|       |                         | Dummy 1 (AG vs. AA & GG) | 0.946   | 3.835 | 0.805 | -6.601; 8.493   |
|       |                         | Dummy 2 (GG vs. AA & AG) | -2.188  | 3.936 | 0.579 | -9.935; 5.558   |
|       |                         | CTQ $\times$ Dummy 1     | -0.266  | 0.313 | 0.396 | -0.883; 0.350   |
|       |                         | CTQ $\times$ Dummy 2     | -0.021  | 0.320 | 0.947 | -0.652; 0.609   |
|       | rs4818 ( $N = 304$ )    | CTQ (centered)           | 0.224   | 0.145 | 0.123 | -0.061; 0.510   |
|       |                         | Dummy 1 (CG vs. CC & GG) | 5.754   | 3.061 | 0.061 | -0.271; 11.779  |
|       |                         | Dummy 2 (GG vs. CC & CG) | 0.284   | 4.035 | 0.944 | -7.658; 8.225   |
|       |                         | CTQ $\times$ Dummy 1     | 0.258   | 0.215 | 0.231 | -0.165; 0.682   |
|       |                         | CTQ $\times$ Dummy 2     | 0.256   | 0.390 | 0.513 | -0.512; 1.023   |
| NR3C1 | N363S ( $N = 303$ )     | CTQ (centered)           | 0.372   | 0.106 | 0.000 | 0.164; 0.580    |
|       |                         | Dummy (AG vs. AA)        | -1.517  | 6.004 | 0.801 | -13.333; 10.300 |
|       |                         | CTQ $\times$ Dummy       | -0.320  | 0.527 | 0.544 | -1.356; 0.717   |
|       | ER22/23EK ( $N = 304$ ) | CTQ (centered)           | 0.357   | 0.111 | 0.001 | 0.140; 0.575    |
|       |                         | Dummy (GA vs. GG)        | -11.583 | 6.814 | 0.090 | -24.991; 1.826  |
|       |                         | CTQ $\times$ Dummy       | 0.173   | 0.318 | 0.587 | -0.452; 0.798   |

|               |                                   |                                |        |       |       |                |
|---------------|-----------------------------------|--------------------------------|--------|-------|-------|----------------|
| <i>OXTR</i>   | rs2254298 ( <i>N</i> = 301)       | CTQ (centered)                 | 0.364  | 0.112 | 0.001 | 0.144; 0.584   |
|               |                                   | Dummy (AG vs. GG)              | .250   | 3.726 | 0.946 | -7.083; 7.584  |
|               |                                   | CTQ × Dummy                    | -0.036 | 0.284 | 0.898 | -0.596; 0.523  |
|               | rs53576 ( <i>N</i> = 430)         | CTQ (centered)                 | 0.468  | 0.139 | 0.001 | 0.196; 0.741   |
|               |                                   | Dummy 1 (AG vs. GG & AA)       | 1.498  | 2.572 | 0.561 | -3.558; 6.553  |
|               |                                   | Dummy 2 (AA vs. GG & AG)       | -1.570 | 4.051 | 0.699 | -9.532; 6.392  |
|               |                                   | CTQ × Dummy 1                  | -0.238 | 0.194 | 0.220 | -0.619; 0.143  |
|               |                                   | CTQ × Dummy 2                  | -0.327 | 0.311 | 0.294 | -0.939; 0.285  |
|               |                                   |                                |        |       |       |                |
| <i>CRHR1</i>  | rs242938 ( <i>N</i> = 303)        | CTQ (centered)                 | 0.336  | 0.113 | 0.003 | 0.113; 0.559   |
|               |                                   | Dummy (GA vs. GG)              | 4.826  | 3.842 | 0.210 | -2.735; 12.387 |
|               |                                   | CTQ × Dummy                    | 0.092  | 0.278 | 0.742 | -0.456; 0.639  |
| <i>SLC6A4</i> | 5HTTLPR/rs25531 ( <i>N</i> = 304) | CTQ (centered)                 | 0.511  | 0.232 | 0.028 | 0.055; 0.967   |
|               |                                   | Dummy 1 (L'S' vs. L'L' & S'S') | 0.866  | 3.459 | 0.802 | -5.941; 7.674  |
|               |                                   | Dummy 2 (S'S' vs. L'L' & L'S') | 2.573  | 4.018 | 0.522 | -5.335; 10.481 |
|               |                                   | CTQ × Dummy 1                  | -0.196 | 0.270 | 0.469 | -0.728; 0.336  |
|               |                                   | CTQ × Dummy 2                  | -0.204 | 0.312 | 0.514 | -0.819; 0.411  |
| <i>BDNF</i>   | rss6265 ( <i>N</i> = 304)         | CTQ (centered)                 | 0.409  | 0.138 | 0.003 | 0.137; 0.681   |
|               |                                   | Dummy 1 (GA vs. GG & AA)       | -0.233 | 2.986 | 0.938 | -6.110; 5.643  |

|  |                         |                          |        |       |       |                |
|--|-------------------------|--------------------------|--------|-------|-------|----------------|
|  |                         | Dummy 2 (AA vs. GG & GA) | -2.363 | 6.243 | 0.705 | -14.648; 9.923 |
|  |                         | CTQ $\times$ Dummy 1     | -0.307 | 0.221 | 0.166 | -0.743; 0.129  |
|  |                         | CTQ $\times$ Dummy 2     | 0.592  | 0.361 | 0.102 | -0.119; 1.304  |
|  | rs988768 ( $N = 304$ )  | CTQ (centered)           | 0.428  | 0.144 | 0.003 | 0.144; 0.711   |
|  |                         | Dummy 1 (CG vs. GG & CC) | 1.154  | 2.949 | 0.696 | -4.649; 6.957  |
|  |                         | Dummy 2 (CC vs. GG & CG) | -3.675 | 5.764 | 0.524 | -15.018; 7.668 |
|  |                         | CTQ $\times$ Dummy 1     | -0.222 | 0.218 | 0.308 | -0.650; 0.206  |
|  |                         | CTQ $\times$ Dummy 2     | 0.227  | 0.380 | 0.551 | -0.521; 0.975  |
|  | rs7103411 ( $N = 304$ ) | CTQ (centered)           | 0.446  | 0.141 | 0.002 | 0.168; 0.725   |
|  |                         | Dummy 1 (TC vs. TT & CC) | -0.286 | 2.915 | 0.922 | -6.024; 5.451  |
|  |                         | Dummy 2 (CC vs. TT & TC) | -5.410 | 7.611 | 0.478 | -20.389; 9.569 |
|  |                         | CTQ $\times$ Dummy 1     | -0.235 | 0.212 | 0.269 | -0.652; 0.183  |
|  |                         | CTQ $\times$ Dummy 2     | 0.216  | 0.533 | 0.686 | -0.833; 1.264  |
|  | rs1103014 ( $N = 304$ ) | CTQ (centered)           | 0.429  | 0.144 | 0.003 | 0.146; 0.711   |
|  |                         | Dummy 1 (TC vs. TT & CC) | 0.879  | 2.968 | 0.767 | -4.963; 6.720  |
|  |                         | Dummy 2 (CC vs. TT & TC) | -1.471 | 5.297 | 0.781 | -11.894; 8.952 |
|  |                         | CTQ $\times$ Dummy 1     | -0.309 | 0.220 | 0.161 | -0.741; 0.124  |
|  |                         | CTQ $\times$ Dummy 2     | 0.431  | 0.346 | 0.215 | -0.251; 1.112  |

|  |                           |                          |        |       |       |                |
|--|---------------------------|--------------------------|--------|-------|-------|----------------|
|  | rs11757 ( <i>N</i> = 304) | CTQ (centered)           | 0.408  | 0.151 | 0.007 | 0.111; 0.705   |
|  |                           | Dummy 1 (CG vs. GG & CC) | 1.054  | 2.957 | 0.722 | -4.766; 6.874  |
|  |                           | Dummy 2 (CC vs. GG & CG) | -4.352 | 5.526 | 0.432 | -15.226; 6.522 |
|  |                           | CTQ × Dummy 1            | -0.173 | 0.217 | 0.425 | -0.599; 0.253  |
|  |                           | CTQ × Dummy 2            | 0.263  | 0.378 | 0.487 | -0.481; 1.008  |

*Note:* CTQ-SF, Childhood Trauma Questionnaire – Short Form; ABS-2, Attitude and Belief Scale-2.

# Supplementary Table 4

Coefficients from models in which GABS irrational beliefs was regressed on CTQ childhood maltreatment, genotypes, and their interactions

| Model |                            |                          | B      | SE (B) | P     | 95% CI        |
|-------|----------------------------|--------------------------|--------|--------|-------|---------------|
| COMT  | rs6269 ( <i>N</i> = 304)   | CTQ (centered)           | 0.273  | 0.101  | 0.007 | 0.074; 0.471  |
|       |                            | Dummy 1 (AG vs. AA & GG) | 1.986  | 1.921  | 0.302 | -1.793; 5.766 |
|       |                            | Dummy 2 (GG vs. AA & AG) | 3.972  | 2.544  | 0.119 | -1.034; 8.978 |
|       |                            | CTQ $\times$ Dummy 1     | -0.078 | 0.135  | 0.561 | -0.344; 0.187 |
|       |                            | CTQ $\times$ Dummy 2     | -0.153 | 0.252  | 0.545 | -0.649; 0.344 |
|       | rs737865 ( <i>N</i> = 430) | CTQ (centered)           | 0.167  | 0.079  | 0.035 | 0.012; 0.323  |
|       |                            | Dummy 1 (AG vs. AA & GG) | 1.716  | 1.590  | 0.281 | -1.410; 4.841 |
|       |                            | Dummy 2 (GG vs. AA & AG) | 3.635  | 2.612  | 0.165 | -1.498; 8.768 |
|       |                            | CTQ $\times$ Dummy 1     | 0.065  | 0.121  | 0.588 | -0.172; 0.303 |
|       |                            | CTQ $\times$ Dummy 2     | -0.062 | 0.199  | 0.757 | -0.453; 0.330 |
|       | rs165774 ( <i>N</i> = 430) | CTQ (centered)           | 0.570  | 0.218  | 0.009 | 0.142; 0.999  |
|       |                            | Dummy 1 (AG vs. AA & GG) | 2.931  | 2.651  | 0.270 | -2.281; 8.142 |
|       |                            | Dummy 2 (GG vs. AA & AG) | -0.071 | 2.646  | 0.979 | -5.271; 5.129 |



|       |                         |                          |        |       |       |                |
|-------|-------------------------|--------------------------|--------|-------|-------|----------------|
|       |                         | CTQ $\times$ Dummy 1     | -0.286 | 0.230 | 0.214 | -0.739; 0.166  |
|       |                         | CTQ $\times$ Dummy 2     | -0.631 | 0.237 | 0.008 | -1.098; -0.165 |
|       | rs2075507 ( $N = 304$ ) | CTQ (centered)           | 0.232  | 0.171 | 0.176 | -0.104; 0.568  |
|       |                         | Dummy 1 (AG vs. AA & GG) | 0.630  | 2.386 | 0.792 | -4.066; 5.326  |
|       |                         | Dummy 2 (GG vs. AA & AG) | -1.912 | 2.449 | 0.436 | -6.732; 2.908  |
|       |                         | CTQ $\times$ Dummy 1     | -0.047 | 0.195 | 0.809 | -0.431; 0.337  |
|       |                         | CTQ $\times$ Dummy 2     | 0.019  | 0.199 | 0.926 | -0.374; 0.411  |
|       | rs4818 ( $N = 304$ )    | CTQ (centered)           | 0.178  | 0.091 | 0.051 | -0.001; 0.356  |
|       |                         | Dummy 1 (CG vs. CC & GG) | 2.892  | 1.912 | 0.131 | -0.870; 6.655  |
|       |                         | Dummy 2 (GG vs. CC & CG) | 2.782  | 2.520 | 0.270 | -2.177; 7.742  |
|       |                         | CTQ $\times$ Dummy 1     | 0.095  | 0.134 | 0.479 | -0.169; 0.360  |
|       |                         | CTQ $\times$ Dummy 2     | 0.053  | 0.243 | 0.829 | -0.426; 0.532  |
| NR3C1 | N363S ( $N = 303$ )     | CTQ (centered)           | 0.232  | 0.066 | 0.000 | 0.103; 0.361   |
|       |                         | Dummy (AG vs. AA)        | 3.038  | 3.727 | 0.416 | -4.297; 10.373 |
|       |                         | CTQ $\times$ Dummy       | -0.321 | 0.327 | 0.327 | -0.964; 0.323  |
|       | ER22/23EK ( $N = 304$ ) | CTQ (centered)           | 0.214  | 0.069 | 0.002 | 0.079; 0.350   |
|       |                         | Dummy (GA vs. GG)        | -3.548 | 4.251 | 0.405 | -11.914; 4.819 |
|       |                         | CTQ $\times$ Dummy       | 0.093  | 0.198 | 0.641 | -0.297; 0.483  |

|               |                                   |                                |        |       |       |                |
|---------------|-----------------------------------|--------------------------------|--------|-------|-------|----------------|
| <i>OXTR</i>   | rs2254298 ( <i>N</i> = 301)       | CTQ (centered)                 | 0.222  | 0.070 | 0.002 | 0.085; 0.360   |
|               |                                   | Dummy (AG vs. GG)              | 2.184  | 2.328 | 0.349 | -2.399; 6.766  |
|               |                                   | CTQ × Dummy                    | -0.028 | 0.178 | 0.874 | -0.378; 0.321  |
|               | rs53576 ( <i>N</i> = 430)         | CTQ (centered)                 | 0.358  | 0.086 | 0.000 | 0.190; 0.526   |
|               |                                   | Dummy 1 (AG vs. GG & AA)       | 0.390  | 1.586 | 0.806 | -2.728; 3.508  |
|               |                                   | Dummy 2 (AA vs. GG & AG)       | -1.375 | 2.498 | 0.582 | -6.286; 3.535  |
|               |                                   | CTQ × Dummy 1                  | -0.267 | 0.120 | 0.026 | -0.502; -0.032 |
|               |                                   | CTQ × Dummy 2                  | -0.439 | 0.192 | 0.023 | -0.816; -0.062 |
|               |                                   |                                |        |       |       |                |
| <i>CRHR1</i>  | rs242938 ( <i>N</i> = 303)        | CTQ (centered)                 | 0.213  | 0.070 | 0.003 | 0.075; 0.352   |
|               |                                   | Dummy (GA vs. GG)              | 3.114  | 2.388 | 0.193 | -1.584; 7.813  |
|               |                                   | CTQ × Dummy                    | 0.005  | 0.173 | 0.978 | -0.335; 0.345  |
| <i>SLC6A4</i> | 5HTTLPR/rs25531 ( <i>N</i> = 304) | CTQ (centered)                 | 0.285  | 0.144 | 0.049 | 0.001; 0.568   |
|               |                                   | Dummy 1 (L'S' vs. L'L' & S'S') | 0.335  | 2.152 | 0.876 | -3.900; 4.570  |
|               |                                   | Dummy 2 (S'S' vs. L'L' & L'S') | 1.264  | 2.500 | 0.614 | -3.656; 6.183  |
|               |                                   | CTQ × Dummy 1                  | -0.069 | 0.168 | 0.683 | -0.400; 0.262  |
|               |                                   | CTQ × Dummy 2                  | -0.119 | 0.194 | 0.542 | -0.501; 0.264  |
| <i>BDNF</i>   | rss6265 ( <i>N</i> = 304)         | CTQ (centered)                 | 0.215  | 0.086 | 0.013 | 0.045; 0.385   |
|               |                                   | Dummy 1 (GA vs. GG & AA)       | 1.005  | 1.865 | 0.590 | -2.665; 4.674  |

|  |                         |                          |        |       |       |                |
|--|-------------------------|--------------------------|--------|-------|-------|----------------|
|  |                         | Dummy 2 (AA vs. GG & GA) | 0.020  | 3.898 | 0.996 | -7.651; 7.691  |
|  |                         | CTQ $\times$ Dummy 1     | -0.080 | 0.138 | 0.562 | -0.352; 0.192  |
|  |                         | CTQ $\times$ Dummy 2     | 0.336  | 0.226 | 0.138 | -0.108; 0.780  |
|  | rs988768 ( $N = 304$ )  | CTQ (centered)           | 0.234  | 0.090 | 0.010 | 0.057; 0.410   |
|  |                         | Dummy 1 (CG vs. GG & CC) | 0.632  | 1.838 | 0.731 | -2.986; 4.250  |
|  |                         | Dummy 2 (CC vs. GG & CG) | -0.522 | 3.594 | 0.885 | -7.594; 6.550  |
|  |                         | CTQ $\times$ Dummy 1     | -0.061 | 0.136 | 0.653 | -0.328; 0.206  |
|  |                         | CTQ $\times$ Dummy 2     | 0.121  | 0.237 | 0.609 | -0.345; 0.588  |
|  | rs7103411 ( $N = 304$ ) | CTQ (centered)           | 0.252  | 0.088 | 0.005 | 0.078; 0.425   |
|  |                         | Dummy 1 (TC vs. TT & CC) | -0.062 | 1.816 | 0.973 | -3.637; 3.513  |
|  |                         | Dummy 2 (CC vs. TT & TC) | -3.170 | 4.742 | 0.504 | -12.502; 6.163 |
|  |                         | CTQ $\times$ Dummy 1     | -0.082 | 0.132 | 0.535 | -0.342; 0.178  |
|  |                         | CTQ $\times$ Dummy 2     | 0.043  | 0.332 | 0.896 | -0.610; 0.696  |
|  | rs1103014 ( $N = 304$ ) | CTQ (centered)           | 0.237  | 0.089 | 0.009 | 0.061; 0.413   |
|  |                         | Dummy 1 (TC vs. TT & CC) | 1.002  | 1.850 | 0.588 | -2.638; 4.642  |
|  |                         | Dummy 2 (CC vs. TT & TC) | 0.050  | 3.301 | 0.988 | -6.445; 6.546  |
|  |                         | CTQ $\times$ Dummy 1     | -0.123 | 0.137 | 0.369 | -0.393; 0.146  |
|  |                         | CTQ $\times$ Dummy 2     | 0.275  | 0.216 | 0.204 | -0.150; 0.699  |

|  |                           |                          |        |       |       |               |
|--|---------------------------|--------------------------|--------|-------|-------|---------------|
|  | rs11757 ( <i>N</i> = 304) | CTQ (centered)           | 0.201  | 0.094 | 0.034 | 0.015; 0.386  |
|  |                           | Dummy 1 (CG vs. GG & CC) | 0.745  | 1.844 | 0.687 | -2.884; 4.374 |
|  |                           | Dummy 2 (CC vs. GG & CG) | -0.645 | 3.445 | 0.852 | -7.425; 6.135 |
|  |                           | CTQ × Dummy 1            | 0.007  | 0.135 | 0.961 | -0.259; 0.272 |
|  |                           | CTQ × Dummy 2            | 0.161  | 0.236 | 0.496 | -0.303; 0.625 |

*Note:* CTQ-SF, Childhood Trauma Questionnaire – Short Form; GABS, General Attitudes and Belief Scale.

# Supplementary Table 5

Coefficients from models in which ABS-2 irrational beliefs was regressed on RFQ childhood maltreatment, genotypes, and their interactions

| Model |                            |                          | B      | SE (B) | P     | 95% CI          |
|-------|----------------------------|--------------------------|--------|--------|-------|-----------------|
| COMT  | rs6269 ( <i>N</i> = 309)   | RFQ (centered)           | 3.204  | 3.286  | 0.330 | -3.263; 9.670   |
|       |                            | Dummy 1 (AG vs. AA & GG) | 3.080  | 3.104  | 0.322 | -3.028; 9.188   |
|       |                            | Dummy 2 (GG vs. AA & AG) | 1.909  | 4.149  | 0.646 | -6.256; 10.074  |
|       |                            | RFQ × Dummy 1            | 3.185  | 4.312  | 0.461 | -5.301; 11.671  |
|       |                            | RFQ × Dummy 2            | 1.945  | 7.805  | 0.803 | -13.414; 17.303 |
|       | rs737865 ( <i>N</i> = 438) | RFQ (centered)           | 3.925  | 2.462  | 0.112 | -0.913; 8.763   |
|       |                            | Dummy 1 (AG vs. AA & GG) | 2.509  | 2.574  | 0.330 | -2.550; 7.568   |
|       |                            | Dummy 2 (GG vs. AA & AG) | 0.918  | 4.185  | 0.826 | -7.308; 9.145   |
|       |                            | RFQ × Dummy 1            | 1.556  | 3.630  | 0.668 | -5.579; 8.691   |
|       |                            | RFQ × Dummy 2            | 5.491  | 6.010  | 0.361 | -6.321; 17.303  |
|       | rs165774 ( <i>N</i> = 438) | RFQ (centered)           | 12.142 | 5.845  | 0.038 | 0.655; 23.630   |
|       |                            | Dummy 1 (AG vs. AA & GG) | 5.497  | 4.324  | 0.204 | -3.002; 13.995  |
|       |                            | Dummy 2 (GG vs. AA & AG) | -0.579 | 4.311  | 0.893 | -9.052; 7.894   |

|       |                         |                          |         |       |       |                 |
|-------|-------------------------|--------------------------|---------|-------|-------|-----------------|
|       |                         | RFQ $\times$ Dummy 1     | -2.995  | 6.327 | 0.636 | -15.431; 9.441  |
|       |                         | RFQ $\times$ Dummy 2     | -13.063 | 6.389 | 0.042 | -25.621; -0.505 |
|       | rs2075507 ( $N = 309$ ) | RFQ (centered)           | 5.340   | 4.477 | 0.234 | -3.470; 14.150  |
|       |                         | Dummy 1 (AG vs. AA & GG) | 1.055   | 3.863 | 0.785 | -6.548; 8.657   |
|       |                         | Dummy 2 (GG vs. AA & AG) | -1.863  | 3.958 | 0.638 | -9.653; 5.926   |
|       |                         | RFQ $\times$ Dummy 1     | -1.598  | 5.409 | 0.768 | -12.241; 9.046  |
|       |                         | RFQ $\times$ Dummy 2     | 1.417   | 5.639 | 0.802 | -9.679; 12.513  |
|       | rs4818 ( $N = 309$ )    | RFQ (centered)           | 1.813   | 3.083 | 0.557 | -4.254; 7.881   |
|       |                         | Dummy 1 (CG vs. CC & GG) | 5.125   | 3.070 | 0.096 | -0.916; 11.166  |
|       |                         | Dummy 2 (GG vs. CC & CG) | 0.192   | 4.073 | 0.962 | -7.822; 8.207   |
|       |                         | RFQ $\times$ Dummy 1     | 5.112   | 4.229 | 0.228 | -3.209; 13.434  |
|       |                         | RFQ $\times$ Dummy 2     | 7.768   | 7.628 | 0.309 | -7.242; 22.779  |
| NR3CI | N363S ( $N = 308$ )     | RFQ (centered)           | 5.620   | 2.097 | 0.008 | 1.493; 9.746    |
|       |                         | Dummy (AG vs. AA)        | -1.177  | 5.976 | 0.844 | -12.937; 10.583 |
|       |                         | RFQ $\times$ Dummy       | -6.139  | 8.264 | 0.458 | -22.401; 10.124 |
|       | ER22/23EK ( $N = 309$ ) | RFQ (centered)           | 4.644   | 2.121 | 0.029 | 0.471; 8.817    |
|       |                         | Dummy (GA vs. GG)        | -10.871 | 6.720 | 0.107 | -24.095; 2.353  |
|       |                         | RFQ $\times$ Dummy       | 8.463   | 6.977 | 0.226 | -5.266; 22.192  |

|        |                                   |                                |         |       |       |                 |
|--------|-----------------------------------|--------------------------------|---------|-------|-------|-----------------|
| OXTR   | rs2254298 ( <i>N</i> = 306)       | RFQ (centered)                 | 4.592   | 2.179 | 0.036 | 0.304; 8.880    |
|        |                                   | Dummy (AG vs. GG)              | 0.727   | 3.754 | 0.847 | -6.659; 8.113   |
|        |                                   | RFQ × Dummy                    | 2.684   | 5.793 | 0.643 | -8.716; 14.084  |
|        | rs53576 ( <i>N</i> = 438)         | RFQ (centered)                 | 7.584   | 2.517 | 0.003 | 2.636; 12.531   |
|        |                                   | Dummy 1 (AG vs. GG & AA)       | 2.029   | 2.571 | 0.430 | -3.024; 7.082   |
|        |                                   | Dummy 2 (AA vs. GG & AG)       | -0.260  | 4.124 | 0.950 | -8.365; 7.845   |
|        |                                   | RFQ × Dummy 1                  | -2.539  | 3.655 | 0.488 | -9.722; 4.644   |
|        |                                   | RFQ × Dummy 2                  | -11.926 | 5.614 | 0.034 | -22.960; -0.891 |
| CRHR1  | rs242938 ( <i>N</i> = 308)        | RFQ (centered)                 | 4.335   | 2.159 | 0.046 | 0.086; 8.584    |
|        |                                   | Dummy (GA vs. GG)              | 5.092   | 3.855 | 0.188 | -2.494; 12.677  |
|        |                                   | RFQ × Dummy                    | 6.079   | 6.056 | 0.316 | -5.837; 17.996  |
| SLC6A4 | 5HTTLPR/rs25531 ( <i>N</i> = 309) | RFQ (centered)                 | 7.600   | 3.887 | 0.051 | -0.050; 15.250  |
|        |                                   | Dummy 1 (L'S' vs. L'L' & S'S') | 1.452   | 3.447 | 0.674 | -5.331; 8.235   |
|        |                                   | Dummy 2 (S'S' vs. L'L' & L'S') | 3.570   | 4.022 | 0.376 | -4.346; 11.485  |
|        |                                   | RFQ × Dummy 1                  | -3.026  | 4.804 | 0.529 | -12.479; 6.427  |
|        |                                   | RFQ × Dummy 2                  | -4.395  | 5.869 | 0.454 | -15.943; 7.153  |
| BDNF   | rss6265 ( <i>N</i> = 309)         | RFQ (centered)                 | 6.402   | 2.611 | 0.015 | 1.264; 11.539   |
|        |                                   | Dummy 1 (GA vs. GG & AA)       | 0.384   | 2.969 | 0.897 | -5.460; 6.227   |

|  |                         |                          |        |        |       |                 |
|--|-------------------------|--------------------------|--------|--------|-------|-----------------|
|  |                         | Dummy 2 (AA vs. GG & GA) | -0.437 | 6.186  | 0.944 | -12.609; 11.735 |
|  |                         | RFQ $\times$ Dummy 1     | -6.513 | 4.248  | 0.126 | -14.872; 1.846  |
|  |                         | RFQ $\times$ Dummy 2     | 19.748 | 8.909  | 0.027 | 2.216; 37.280   |
|  | rs988768 ( $N = 309$ )  | RFQ (centered)           | 6.872  | 2.691  | 0.011 | 1.576; 12.167   |
|  |                         | Dummy 1 (CG vs. GG & CC) | 1.654  | 2.953  | 0.576 | -4.157; 7.466   |
|  |                         | Dummy 2 (CC vs. GG & CG) | -1.180 | 5.687  | 0.836 | -12.371; 10.010 |
|  |                         | RFQ $\times$ Dummy 1     | -5.379 | 4.301  | 0.212 | -13.843; 3.086  |
|  |                         | RFQ $\times$ Dummy 2     | 3.648  | 7.978  | 0.648 | -12.052; 19.348 |
|  | rs7103411 ( $N = 309$ ) | RFQ (centered)           | 7.187  | 2.618  | 0.006 | 2.036; 12.338   |
|  |                         | Dummy 1 (TC vs. TT & CC) | 0.122  | 2.918  | 0.967 | -5.620; 5.865   |
|  |                         | Dummy 2 (CC vs. TT & TC) | -5.740 | 7.647  | 0.453 | -20.788; 9.308  |
|  |                         | RFQ $\times$ Dummy 1     | -5.403 | 4.250  | 0.205 | -13.766; 2.960  |
|  |                         | RFQ $\times$ Dummy 2     | -1.484 | 10.752 | 0.890 | -22.642; 19.673 |
|  | rs1103014 ( $N = 309$ ) | RFQ (centered)           | 6.730  | 2.721  | 0.014 | 1.376; 12.085   |
|  |                         | Dummy 1 (TC vs. TT & CC) | 1.437  | 2.977  | 0.630 | -4.421; 7.296   |
|  |                         | Dummy 2 (CC vs. TT & TC) | 1.254  | 5.251  | 0.811 | -9.079; 11.587  |
|  |                         | RFQ $\times$ Dummy 1     | -6.032 | 4.303  | 0.162 | -14.499; 2.435  |
|  |                         | RFQ $\times$ Dummy 2     | 7.716  | 7.443  | 0.301 | -6.931; 22.362  |



|  |                       |                          |        |       |       |                 |
|--|-----------------------|--------------------------|--------|-------|-------|-----------------|
|  | rs11757 ( $N = 309$ ) | RFQ (centered)           | 6.263  | 2.868 | 0.030 | 0.619; 11.907   |
|  |                       | Dummy 1 (CG vs. GG & CC) | 1.600  | 2.969 | 0.590 | -4.243; 7.444   |
|  |                       | Dummy 2 (CC vs. GG & CG) | -2.172 | 5.492 | 0.693 | -12.978; 8.634  |
|  |                       | RFQ $\times$ Dummy 1     | -3.612 | 4.239 | 0.395 | -11.953; 4.729  |
|  |                       | RFQ $\times$ Dummy 2     | 4.350  | 7.917 | 0.583 | -11.228; 19.929 |

*Note:* ABS-2, Attitude and Belief Scale-2; RFQ, Risky Families Questionnaire.

### Supplementary Table 6

Coefficients from models in which GABS irrational beliefs was regressed on RFQ childhood maltreatment, genotypes, and their interactions

| Model       |                            |                          | B      | SE (B) | P     | 95% CI         |
|-------------|----------------------------|--------------------------|--------|--------|-------|----------------|
| <i>COMT</i> | rs6269 ( <i>N</i> = 304)   | RFQ (centered)           | 3.039  | 2.044  | 0.138 | -0.984; 7.062  |
|             |                            | Dummy 1 (AG vs. AA & GG) | 2.081  | 1.933  | 0.283 | -1.723; 5.885  |
|             |                            | Dummy 2 (GG vs. AA & AG) | 4.338  | 2.599  | 0.096 | -0.776; 9.452  |
|             |                            | RFQ × Dummy 1            | 1.019  | 2.685  | 0.705 | -4.265; 6.303  |
|             |                            | RFQ × Dummy 2            | 0.235  | 4.865  | 0.961 | -9.338; 9.809  |
|             | rs737865 ( <i>N</i> = 431) | RFQ (centered)           | 2.220  | 1.537  | 0.150 | -0.802; 5.242  |
|             |                            | Dummy 1 (AG vs. AA & GG) | 1.835  | 1.594  | 0.250 | -1.298; 4.968  |
|             |                            | Dummy 2 (GG vs. AA & AG) | 3.584  | 2.625  | 0.173 | -1.576; 8.743  |
|             |                            | RFQ × Dummy 1            | 0.753  | 2.284  | 0.742 | -3.736; 5.241  |
|             |                            | RFQ × Dummy 2            | 1.795  | 3.738  | 0.631 | -5.552; 9.142  |
|             | rs165774 ( <i>N</i> = 431) | RFQ (centered)           | 6.844  | 3.601  | 0.058 | -0.234; 13.921 |
|             |                            | Dummy 1 (AG vs. AA & GG) | 3.162  | 2.671  | 0.237 | -2.088; 8.412  |
|             |                            | Dummy 2 (GG vs. AA & AG) | -0.056 | 2.664  | 0.983 | -5.293; 5.180  |

|       |                         |                          |        |       |       |                 |
|-------|-------------------------|--------------------------|--------|-------|-------|-----------------|
|       |                         | RFQ $\times$ Dummy 1     | -1.440 | 3.909 | 0.713 | -9.122; 6.243   |
|       |                         | RFQ $\times$ Dummy 2     | -8.144 | 3.954 | 0.040 | -15.915; -0.372 |
|       | rs2075507 ( $N = 304$ ) | RFQ (centered)           | 3.121  | 2.776 | 0.262 | -2.341; 8.584   |
|       |                         | Dummy 1 (AG vs. AA & GG) | 0.902  | 2.400 | 0.707 | -3.822; 5.627   |
|       |                         | Dummy 2 (GG vs. AA & AG) | -1.734 | 2.464 | 0.482 | -6.584; 3.116   |
|       |                         | RFQ $\times$ Dummy 1     | -0.261 | 3.364 | 0.938 | -6.881; 6.360   |
|       |                         | RFQ $\times$ Dummy 2     | 1.371  | 3.506 | 0.696 | -5.529; 8.271   |
|       | rs4818 ( $N = 304$ )    | RFQ (centered)           | 1.984  | 1.929 | 0.305 | -1.812; 5.780   |
|       |                         | Dummy 1 (CG vs. CC & GG) | 2.785  | 1.923 | 0.148 | -0.998; 6.569   |
|       |                         | Dummy 2 (GG vs. CC & CG) | 3.172  | 2.566 | 0.217 | -1.877; 8.221   |
|       |                         | RFQ $\times$ Dummy 1     | 2.485  | 2.650 | 0.349 | -2.730; 7.699   |
|       |                         | RFQ $\times$ Dummy 2     | 4.379  | 4.783 | 0.361 | -5.033; 13.792  |
| NR3CI | N363S ( $N = 303$ )     | RFQ (centered)           | 3.719  | 1.312 | 0.005 | 1.137; 6.300    |
|       |                         | Dummy (AG vs. AA)        | 2.867  | 3.710 | 0.440 | -4.435; 10.168  |
|       |                         | RFQ $\times$ Dummy       | -2.860 | 5.132 | 0.578 | -12.959; 7.238  |
|       | ER22/23EK ( $N = 304$ ) | RFQ (centered)           | 3.137  | 1.332 | 0.019 | 0.517; 5.758    |
|       |                         | Dummy (GA vs. GG)        | -3.292 | 4.184 | 0.432 | -11.527; 4.942  |
|       |                         | RFQ $\times$ Dummy       | 4.663  | 4.348 | 0.284 | -3.894; 13.220  |

|               |                                   |                                |        |       |       |                 |
|---------------|-----------------------------------|--------------------------------|--------|-------|-------|-----------------|
| <i>OXTR</i>   | rs2254298 ( <i>N</i> = 301)       | RFQ (centered)                 | 3.324  | 1.371 | 0.016 | 0.626; 6.022    |
|               |                                   | Dummy (AG vs. GG)              | 2.346  | 2.345 | 0.318 | -2.269; 6.961   |
|               |                                   | RFQ $\times$ Dummy             | 0.704  | 3.618 | 0.846 | -6.415; 7.823   |
|               | rs53576 ( <i>N</i> = 431)         | RFQ (centered)                 | 5.004  | 1.611 | 0.002 | 1.839; 8.170    |
|               |                                   | Dummy 1 (AG vs. GG & AA)       | 0.430  | 1.592 | 0.787 | -2.698; 3.559   |
|               |                                   | Dummy 2 (AA vs. GG & AG)       | -0.867 | 2.532 | 0.732 | -5.844; 4.110   |
|               |                                   | RFQ $\times$ Dummy 1           | -2.487 | 2.291 | 0.278 | -6.991; 2.016   |
|               |                                   | RFQ $\times$ Dummy 2           | -9.540 | 3.475 | 0.006 | -16.371; -2.709 |
| <i>CRHR1</i>  | rs242938 ( <i>N</i> = 303)        | RFQ (centered)                 | 3.386  | 1.353 | 0.013 | 0.723; 6.049    |
|               |                                   | Dummy (GA vs. GG)              | 3.214  | 2.399 | 0.181 | -1.507; 7.934   |
|               |                                   | RFQ $\times$ Dummy             | 0.712  | 3.767 | 0.850 | -6.701; 8.126   |
| <i>SLC6A4</i> | 5HTTLPR/rs25531 ( <i>N</i> = 304) | RFQ (centered)                 | 3.946  | 2.421 | 0.104 | -0.819; 8.711   |
|               |                                   | Dummy 1 (L'S' vs. L'L' & S'S') | 0.516  | 2.161 | 0.812 | -3.737; 4.769   |
|               |                                   | Dummy 2 (S'S' vs. L'L' & L'S') | 1.584  | 2.508 | 0.528 | -3.353; 6.520   |
|               |                                   | RFQ $\times$ Dummy 1           | -0.108 | 3.004 | 0.971 | -6.020; 5.803   |
|               |                                   | RFQ $\times$ Dummy 2           | -1.892 | 3.651 | 0.605 | -9.078; 5.293   |
| <i>BDNF</i>   | rss6265 ( <i>N</i> = 304)         | RFQ (centered)                 | 3.621  | 1.647 | 0.029 | 0.380; 6.862    |
|               |                                   | Dummy 1 (GA vs. GG & AA)       | 0.946  | 1.874 | 0.614 | -2.742; 4.635   |

|  |                         |                          |        |       |       |                 |
|--|-------------------------|--------------------------|--------|-------|-------|-----------------|
|  |                         | Dummy 2 (AA vs. GG & GA) | 0.950  | 3.869 | 0.806 | -6.664; 8.565   |
|  |                         | RFQ $\times$ Dummy 1     | -1.888 | 2.677 | 0.481 | -7.155; 3.380   |
|  |                         | RFQ $\times$ Dummy 2     | 9.627  | 5.575 | 0.085 | -1.345; 20.599  |
|  | rs988768 ( $N = 304$ )  | RFQ (centered)           | 3.967  | 1.689 | 0.020 | 0.642; 7.291    |
|  |                         | Dummy 1 (CG vs. GG & CC) | 0.630  | 1.848 | 0.733 | -3.007; 4.268   |
|  |                         | Dummy 2 (CC vs. GG & CG) | -0.033 | 3.611 | 0.993 | -7.139; 7.074   |
|  |                         | RFQ $\times$ Dummy 1     | -1.934 | 2.688 | 0.472 | -7.224; 3.356   |
|  |                         | RFQ $\times$ Dummy 2     | 3.715  | 5.061 | 0.463 | -6.245; 13.675  |
|  | rs7103411 ( $N = 304$ ) | RFQ (centered)           | 4.411  | 1.646 | 0.008 | 1.171; 7.652    |
|  |                         | Dummy 1 (TC vs. TT & CC) | -0.035 | 1.827 | 0.985 | -3.631; 3.561   |
|  |                         | Dummy 2 (CC vs. TT & TC) | -3.377 | 4.759 | 0.479 | -12.743; 5.989  |
|  |                         | RFQ $\times$ Dummy 1     | -2.417 | 2.657 | 0.364 | -7.646; 2.811   |
|  |                         | RFQ $\times$ Dummy 2     | -0.512 | 6.690 | 0.939 | -13.678; 12.654 |
|  | rs1103014 ( $N = 304$ ) | RFQ (centered)           | 3.987  | 1.705 | 0.020 | 0.632; 7.343    |
|  |                         | Dummy 1 (TC vs. TT & CC) | 1.025  | 1.860 | 0.582 | -2.634; 4.685   |
|  |                         | Dummy 2 (CC vs. TT & TC) | 0.842  | 3.316 | 0.800 | -5.684; 7.368   |
|  |                         | RFQ $\times$ Dummy 1     | -2.782 | 2.684 | 0.301 | -8.064; 2.500   |
|  |                         | RFQ $\times$ Dummy 2     | 6.622  | 4.698 | 0.160 | -2.624; 15.868  |

|  |                       |                          |        |       |       |                |
|--|-----------------------|--------------------------|--------|-------|-------|----------------|
|  | rs11757 ( $N = 304$ ) | RFQ (centered)           | 3.345  | 1.803 | 0.064 | -0.203; 6.893  |
|  |                       | Dummy 1 (CG vs. GG & CC) | 0.719  | 1.859 | 0.699 | -2.939; 4.378  |
|  |                       | Dummy 2 (CC vs. GG & CG) | -0.264 | 3.476 | 0.940 | -7.104; 6.576  |
|  |                       | RFQ $\times$ Dummy 1     | -0.418 | 2.652 | 0.875 | -5.636; 4.801  |
|  |                       | RFQ $\times$ Dummy 2     | 4.098  | 5.010 | 0.414 | -5.761; 13.958 |

*Note:* GABS, General Attitudes and Belief Scale; RFQ, Risky Families Questionnaire.

## Supplementary Table 7

Allelic frequencies in the European population, according to the dbSNP (<https://www.ncbi.nlm.nih.gov/snp/>)

| Gene polymorphism             | Allele (frequency %) in Europeans |                             | Sample size (no. of genotyped participants) | Reference                                                                                             |
|-------------------------------|-----------------------------------|-----------------------------|---------------------------------------------|-------------------------------------------------------------------------------------------------------|
| <i>COMT</i> rs6269            | A (60.19)                         | G (39.8)                    | 32946                                       | <a href="https://www.ncbi.nlm.nih.gov/snp/rs6269">https://www.ncbi.nlm.nih.gov/snp/rs6269</a>         |
| <i>COMT</i> rs737865          | A (70.5)                          | G (29.45)                   | 140924                                      | <a href="https://www.ncbi.nlm.nih.gov/snp/rs737865">https://www.ncbi.nlm.nih.gov/snp/rs737865</a>     |
| <i>COMT</i> rs165774          | G (68.62)                         | A (31.37)                   | 98852                                       | <a href="https://www.ncbi.nlm.nih.gov/snp/rs165774">https://www.ncbi.nlm.nih.gov/snp/rs165774</a>     |
| <i>COMT</i> rs2075507         | G (44.75)                         | A (55.25)                   | 13768                                       | <a href="https://www.ncbi.nlm.nih.gov/snp/rs2075507">https://www.ncbi.nlm.nih.gov/snp/rs2075507</a>   |
| <i>COMT</i> rs4818            | C (60.89)                         | G (39.10)                   | 36934                                       | <a href="https://www.ncbi.nlm.nih.gov/snp/rs4818">https://www.ncbi.nlm.nih.gov/snp/rs4818</a>         |
| <i>NR3C1</i> BclI             | G (63.04)                         | C (36.95)                   | 14286                                       | <a href="https://www.ncbi.nlm.nih.gov/snp/rs41423247">https://www.ncbi.nlm.nih.gov/snp/rs41423247</a> |
| <i>NR3C1</i> N363S            | T (96.79)                         | C (3.2)                     | 214000                                      | <a href="https://www.ncbi.nlm.nih.gov/snp/rs56149945">https://www.ncbi.nlm.nih.gov/snp/rs56149945</a> |
| <i>NR3C1</i> ER22/23EK        | C (97.52)                         | G (2.47)                    | 285418                                      | <a href="https://www.ncbi.nlm.nih.gov/snp/rs6190">https://www.ncbi.nlm.nih.gov/snp/rs6190</a>         |
| <i>OXTR</i> rs2254298         | G (88.71)                         | A (11.28)                   | 32396                                       | <a href="https://www.ncbi.nlm.nih.gov/snp/rs2254298">https://www.ncbi.nlm.nih.gov/snp/rs2254298</a>   |
| <i>OXTR</i> rs53576           | A (32.57)                         | G (67.42)                   | 62252                                       | <a href="https://www.ncbi.nlm.nih.gov/snp/rs53576">https://www.ncbi.nlm.nih.gov/snp/rs53576</a>       |
| <i>CRHR1</i> rs242938         | A (7.51)                          | G (92.48)                   | 14286                                       | <a href="https://www.ncbi.nlm.nih.gov/snp/rs242938">https://www.ncbi.nlm.nih.gov/snp/rs242938</a>     |
| <i>SLC6A4</i> 5HTTLPR/rs25531 | T or L <sub>A</sub> (97.87)       | C or L <sub>G</sub> (2.13%) | 8684                                        | <a href="https://www.ncbi.nlm.nih.gov/snp/rs25531">https://www.ncbi.nlm.nih.gov/snp/rs25531</a>       |
| <i>BDNF</i> rs6265            | C (80.62)                         | T (19.37)                   | 336012                                      | <a href="https://www.ncbi.nlm.nih.gov/snp/rs6265">https://www.ncbi.nlm.nih.gov/snp/rs6265</a>         |
| <i>BDNF</i> rs988748          | C (20.39)                         | G (79.60)                   | 14420                                       | <a href="https://www.ncbi.nlm.nih.gov/snp/rs988748">https://www.ncbi.nlm.nih.gov/snp/rs988748</a>     |
| <i>BDNF</i> rs7103411         | C (22.51)                         | T (77.48)                   | 127900                                      | <a href="https://www.ncbi.nlm.nih.gov/snp/rs7103411">https://www.ncbi.nlm.nih.gov/snp/rs7103411</a>   |
| <i>BDNF</i> rs1103014         | A (37.39)                         | G (62.60)                   | 27100                                       | <a href="https://www.ncbi.nlm.nih.gov/snp/rs622628">https://www.ncbi.nlm.nih.gov/snp/rs622628</a>     |
| <i>BDNF</i> rs11757           | C (72.76)                         | G (27.23)                   | 17594                                       | <a href="https://www.ncbi.nlm.nih.gov/snp/rs11757">https://www.ncbi.nlm.nih.gov/snp/rs11757</a>       |
